# Supplementary material for: Rapid Communication: Middle Pleistocene Transition as a Phenomenon of Orbitally Enabled Sensitivity to Initial Values
Source: Copernicus journal article supplement (doi:10.5194/egusphere-2025-3334), 2025-07-25
Supplement: Supplementary file [file egusphere-2025-3334-AC1-supplement.pdf]

Dear Anonymous Reviewer,

Thank you for reviewing our manuscript and providing insightful feedback. Below, we reply to your comments (marked as **bold blue**) and propose several changes to the manuscript motivated by your suggestions.

**The Rapid Communication manuscript by Verbitsky and Omta describes the relaxation behavior when an idealized model of the ocean's alkalinity budget is subjected to idealized orbital forcing, documenting spontaneous changes in the dominant periodicity of the model response. The manuscript draws an interesting comparison to the Mid-Pleistocene Transition from obliquity-pacing of climate to a saw-tooth pattern with ~100kyr dominant periodicity, but it offers little discussion why the dynamic behavior of the idealized model should apply to the real Earth System. Because of the abbreviated format of the manuscript it is difficult to assess the significance of the work.**

**Response:** Your general comment consists of two parts and we would like to respond to them separately.

First, we definitely appreciate that you consider our findings to be interesting. We would like to clarify though that the essence of them is not simply a spontaneous change of the dominant periodicity, but a strong dependence of this process on initial values. And finally – the most intriguing part of this phenomenon - this dependence on initial conditions is enabled by the orbital forcing. When the orbital forcing is weak, the asymptotic period is initial-values independent. A strong orbital forcing makes these periods highly sensitive to initial values. We tried to underline this by bringing this observation to the title of the paper.

We understand the second part of your comment (“**why the dynamic behavior of the idealized model should apply to the real Earth System**”) as your concern about the physical content of the model. Such concern is very appropriate. Over the last two decades, the field of Pleistocene glacial-rhythmicity studies has been overwhelmed by research based on so called “conceptual” or phenomenological models that do not have any physical basis except their ability (often artificially forced by Boolean statements) to reproduce the empirical record. Verbitsky and Crucifix (2023) have warned the scientific community that conceptual models may simply not have a physical similarity with nature and therefore add little to our understanding of it. Accordingly, we selected a model that is based on the physically explicit ocean alkalinity budget. Hence, this is certainly a development in the direction you so rightly advocate for.

Let us offer you a big picture that (because of the “**abbreviated format**”) may not have been articulated extensively enough. It is not our intention to claim that the discovered phenomenon is a single possible explanation of the Mid-Pleistocene Transition (MPT). In fact, one of the authors expended significant efforts to demonstrate that because of the fundamental properties of viscous ice mass- and heat-conservation equations, the MPT could be an outcome of multiple scenarios of completely different nature (Verbitsky, 2022). Moreover, it has recently been discovered (Verbitsky and Volobuev, 2024) that the orbital forcing may enable sensitivity of the ice-climate system to initial values, which provides even more MPT scenarios.

We started our experiments with the ocean alkalinity-calcification system because we wanted to see how general this phenomenon (orbitally enabled sensitivity to initial values) is and indeed, we found it in this system as well. It would be relatively easy now to write the

mass-balance equation of the ice sheet with the alkalinity (or CO<sub>2</sub>) as the forcing on the right-hand side of it and to reproduce the empirical record under “reasonable assumptions” about unconstrained parameters. However, this is exactly what we do not want to do, because it would be yet another fitting exercise that does not prove a scenario is unique but simply demonstrates that it is within the range of admissible parameters. Instead, we want the scientific community to realize that *a single empirical time series that is given to us by nature is in fact very fragile and it could have been very different under subtle changes of the million-years-old initial values of ocean alkalinity*. It is not, indeed, the Saltzman-Lorentz “butterfly” effect but it is reminiscent of it (See also Fig. AC1-1 below).

**Action:** We will articulate more clearly both the essence of our observation and the goal of our study.

#### Detailed comments:

**1. Orbital forcing of the calcification rate constant as the primary driver of CO<sub>2</sub> change is a highly unusual model to use, and simulating the ocean’s alkalinity budget completely independent of seawater carbonate saturation state is questionable. This model may be suitable if the point of the manuscript is simply to document “a remarkable physical phenomenon”, but drawing any conclusions about the paleoclimate record based on these results would require detailed justification of the model and discussion of its applicability.**

**Response:** Yes, the point of the manuscript is simply to document a remarkable physical phenomenon and we are glad that you find the model to be suitable for this purpose.

Having said this, we agree that the ocean’s alkalinity budget is affected by the seawater carbonate saturation state. In particular, calcite preservation tends to increase with increasing carbonate ion concentration (Broecker and Peng, 1982; Archer, 1996). This carbonate compensation feedback was included in the detailed multi-box version of the calcifier-alkalinity model (Omta et al., 2013). Essentially, carbonate compensation acted as a negative feedback that enhanced the damping of the cycles. If the periodic forcing was sufficiently strong to overcome this damping, then the model behavior was very similar to the behavior of the model without carbonate compensation (see Fig. 5 in Omta et al., 2013). Here we chose to use the simpler, more parsimonious model.

As Grigory Barenblatt (2003) said, “applied mathematics is the *art* of constructing mathematical models of phenomena in nature”. It is an art because there are no strict rules about model design, and it often takes the intuition of a scientist to select which physics is the cornerstone of the model. We study ice ages and therefore, for many years, the physics of ice flow was a natural choice for building ice-age models for many scientists (including one of the authors). Even so, the ocean alkalinity cycle operates on these same orbital timescales. Orbital forcing of the calcification rate constant may be “unusual”, but “unusual” is not a physical argument, and we have to talk about physical feasibility instead. As we have mentioned (lines 85-86), “...there exists observational evidence of variations in calcifier productivity correlated with Milankovitch cycles (Beaufort et al., 1997; Herbert,

1997)”; orbital forcing of the calcification rate constant seems therefore to be a reasonable possibility.

**Action:** We will add above discussion to the revised version of the paper.

**2. The authors draw attention to the fact that the model remains phase locked to the forcing frequency for millions of years before spontaneously settling on oscillation with a dominant period that appears to be an integer multiple of the forcing period. The authors should explain how their finding is similar or different to the notion of skipping obliquity cycles advanced by Wunsch and Huybers. Is this simply a case of non-linear phase locking?**

**Response:** Non-linear phase locking is an initial-values independent process (Tziperman et al., 2006, we are quoting this paper by Tziperman, Raymo, Huybers, and Wunsch because it is more detailed than the earlier papers by Wunsch and Huybers). In our model, the asymptotic periodicity of 40, 80, or 120 kyr depends on initial values and this dependence on initial values is enabled by the orbital forcing. When the orbital forcing is weak, the asymptotic period is initial-values independent. A strong orbital forcing makes these periods highly sensitive to the initial values.

**Action:** We will articulate more clearly the essence of our observation relative to non-linear phase locking.

**3. Given the emphasis on the million-year persistence of influence from the model initial values it is worth noting that the model does not include any stochastic “white noise” term that would over time erode in initial value information. It would have been helpful if Figure 1 included a small set of identically forced simulations with different initial conditions, to assess if they relax onto the same long-term solution. Also, it would have been helpful if the manuscript included power spectra and phase space portraits for the different solution groups indicated in Figure 2b.**

**Response:** It is unfortunate that Fig. 3 somehow escaped your attention. This figure represents exactly what you are asking for, and not for a “small set” but for 12,798 model experiments. All our findings are based on these experiments.

Though we will not be able to show all 12,798 time series, having some samples is certainly a good idea. Since all our scaling laws and results are focused on periodicity, we believe that periodicity time series like Fig. 2b will serve our readers best. In Fig. AC1-1, we show three periodicity time series with slightly different initial conditions  $A(0)=1.990$  (mM eq),  $A(0)=1.995$  (mM eq), and  $A(0)=2.010$  (mM eq). It can be seen that the alkalinity-calcification system has a long memory and the orbital forcing makes it highly sensitive to initial values.

(a)

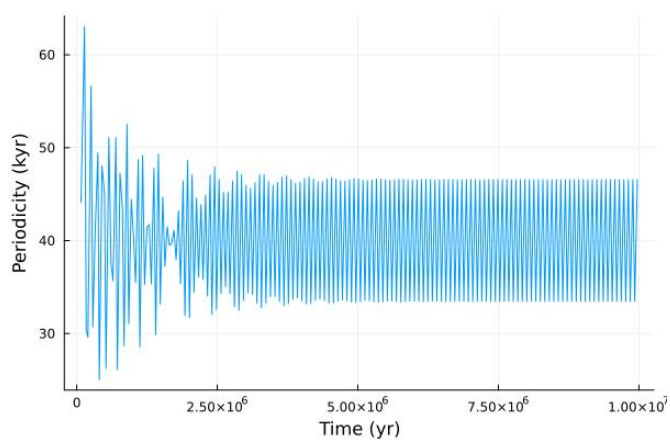

(b)

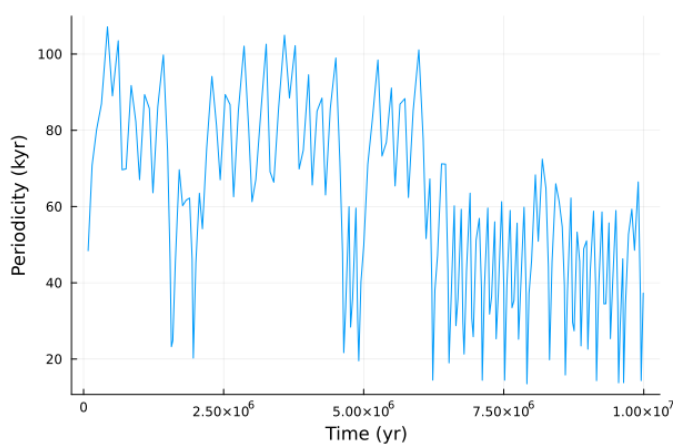

(c)

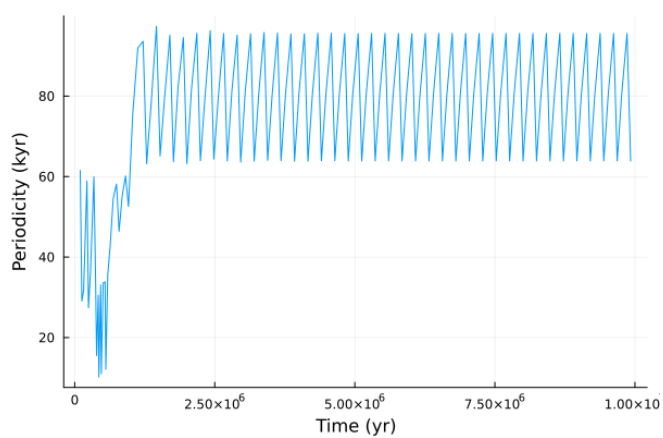

**Figure AC1-1.** C-A system dominant period as a function of time under orbital forcing,  $\alpha = 0.0134$ : (a)  $A(0) = 1.990$  mM eq, (b)  $A(0) = 1.995$  mM eq, (c)  $A(0) = 2.010$  mM eq.

**Action:** We will discuss Fig. AC1-1 in the revised version of the paper.

**4. The conclusion takes a major leap from the identified behavior of the model to claiming that “thus MPT exhibits a remarkable physical phenomenon” [line 188]. In absence of any significant discussion on the applicability of the model to the MPT this leap seems rather speculative. Further, it would have been helpful if the manuscript had elaborated on the implications for the interpretation of the dynamic mechanism yielding obliquity-paced iNHG and presumably preconditioning the system to experience some type of MPT. For example, if the model dynamical behavior is applicable then climate change should always lag CO<sub>2</sub> change, which always lags orbital forcing by thousands of years.**

**Response:** Let us read lines 185-189 again: “Most intriguingly, the conglomerate similarity parameter also tells us that such an “intimate” terrestrial property as the sensitivity of alkalinity-calcination system to initial values manifests itself only under orbital forcing and thus MPT exhibits a remarkable physical phenomenon of orbitally enabled sensitivity to initial values”. Since we are talking here about the alkalinity-calcification system, the statement seems very accurate. Maybe to avoid the impression of a leap, instead of MPT we should call this phenomenon MPT-like events, MPT-type, MPT-resembling events, or so.

With your further suggestion to elaborate “**on the implications for the interpretation of the dynamic mechanism yielding obliquity-paced iNHG**” you seem to try to fit our study into the existing paradigm of the obliquity-paced fluctuations. The whole point of our study is to challenge this paradigm. Specifically, we demonstrate that the terrestrial climate system has a long memory; the orbital forcing makes the ocean chemistry highly sensitive to initial values, and altogether it may make Earth climate highly unpredictable (see Fig. AC1-1). Furthermore, causal relationships between variables do not necessarily align with temporal leads and lags in complex nonlinear systems such as the climate (e.g., Van Nes et al., 2015, Verbitsky et al, 2019).

**Action:** We will add the above discussion into the revised version of the paper.

## References

- Archer, D. E.: An atlas of the distribution of calcium carbonate in sediments of the deep sea, *Global Biogeochem. Cycles*, 10, 159–174, 1996.
- Beaufort, L., Lancelot, Y., Camberlin, P., Cayre, O., Vincent, E., Bassinot, F., and Labeyrie, L.: Insolation cycles as a major control of Equatorial Indian Ocean primary production, *Science*, 278, 1451–1454, 1997.
- Barenblatt, G. I.: *Scaling*, Cambridge University Press, Cambridge, ISBN 0 521 53394 5, 2003.
- Broecker, W. S., and Peng, T. H.: *Tracers in the Sea*, Lamont-Doherty Geological Observatory, Palisades, NY, 1982.

Herbert, T.: A long marine history of carbon cycle modulation by orbital-climatic changes, *Proc. Natl. Acad. Sci.*, 94, 8362–8369, 1997.

Omta, A. W., Van Voorn, G. A. K., Rickaby, R. E. M., and Follows, M. J.: On the potential role of marine calcifiers in glacial-interglacial dynamics, *Global Biogeochem. Cycles*, 27, 692–704, 2013.

Tziperman, E., Raymo, M. E., Huybers, P., and Wunsch, C.: Consequences of pacing the Pleistocene 100 kyr ice ages by nonlinear phase locking to Milankovitch forcing, *Paleoceanography*, 21, PA4206, <https://doi.org/10.1029/2005PA001241>, 2006.

Van Nes, E. H., Scheffer, M., Brovkin, V., Lenton, T. M., Ye, H., Deyle E., Sugihara, G.: Causal feedbacks in climate change, *Nat. Clim. Change*, 5, 445–448, 2015.

Verbitsky, M. Y.: Inarticulate past: similarity properties of the ice–climate system and their implications for paleo-record attribution, *Earth Syst. Dynam.*, 13, 879–884, <https://doi.org/10.5194/esd-13-879-2022>, 2022.

Verbitsky, M. Y. and Crucifix, M.: Do phenomenological dynamical paleoclimate models have physical similarity with Nature? Seemingly, not all of them do, *Clim. Past*, 19, 1793–1803, <https://doi.org/10.5194/cp-19-1793-2023>, 2023.

Verbitsky, M. and Volobuev, D.: Milankovitch Theory “as an Initial Value Problem”, *EGUsphere* [preprint], <https://doi.org/10.5194/egusphere-2024-1255>, 2024.

Verbitsky, M. Y., Mann, M. E., Steinman, B. A., and Volobuev, D. M.: Detecting causality signal in instrumental measurements and climate model simulations: global warming case study, *Geosci. Model Dev.*, 12, 4053–4060, <https://doi.org/10.5194/gmd-12-4053-2019>, 2019.
